# Supplementary material for: Efficacy of Ultrasound-Guided Injection of Botulinum Toxin, Ozone, and Lidocaine in Piriformis Syndrome
Source: MDPI journal article supplement (doi:10.3390/healthcare11010095), 2022-12-28
Supplement: s1 [file s1]

| Number | Name   | Group        | Baseline (pre-injection) data |                               |       |              |                            | Outcomes (1-month) |                           | Outcomes (2-months) |                            | Outcomes (3-months) |                            | Outcomes (6-months) |                            |       |       |
|--------|--------|--------------|-------------------------------|-------------------------------|-------|--------------|----------------------------|--------------------|---------------------------|---------------------|----------------------------|---------------------|----------------------------|---------------------|----------------------------|-------|-------|
|        |        |              | Age (years)                   | Sex<br>+Male +F<br>+Female +F | BMJ   | VAS baseline | Oswestry<br>score baseline | VAS 1-month        | Oswestry<br>score 1-month | VAS 2-months        | Oswestry<br>score 2-months | VAS 3-months        | Oswestry<br>score 3-months | VAS 6-months        | Oswestry<br>score 6-months |       |       |
| 1      | 236417 | Lidocaine    | 38                            | M                             | 31    | 8            | 35                         | 2                  | 24                        | 4                   | 35                         | 5                   | 32                         | 7                   | 34                         |       |       |
| 2      | 215404 | Lidocaine    | 29                            | F                             | 29    | 13           | 7                          | 45                 | 1                         | 26                  | 3                          | 35                  | 4                          | 34                  | 6                          | 40    |       |
| 3      | 218483 | Lidocaine    | 40                            | M                             | 35    | 9            | 8                          | 49                 | 3                         | 20                  | 3                          | 31                  | 6                          | 32                  | 8                          | 38    |       |
| 4      | 117806 | Lidocaine    | 56                            | F                             | 27.5  | 7            | 9                          | 33                 | 3                         | 39                  | 4                          | 39                  | 5                          | 29                  | 7                          | 45    |       |
| 5      | 276073 | Lidocaine    | 33                            | M                             | 28    | 14           | 7                          | 31                 | 1                         | 18                  | 3                          | 30                  | 5                          | 31                  | 8                          | 40    |       |
| 6      | 169495 | Lidocaine    | 31                            | M                             | 29    | 9            | 9                          | 33                 | 1                         | 23                  | 5                          | 32                  | 4                          | 31                  | 8                          | 33    |       |
| 7      | 131144 | Lidocaine    | 30                            | M                             | 30    | 12           | 8                          | 41                 | 1                         | 25                  | 4                          | 36                  | 5                          | 35                  | 7                          | 41    |       |
| 8      | 246757 | Lidocaine    | 41                            | M                             | 32    | 10           | 9                          | 59                 | 3                         | 25                  | 4                          | 32                  | 7                          | 38                  | 8                          | 37    |       |
| 9      | 246770 | Lidocaine    | 35                            | F                             | 27    | 8            | 9                          | 30                 | 3                         | 30                  | 5                          | 30                  | 5                          | 28                  | 8                          | 45    |       |
| 10     | 66864  | Lidocaine    | 33                            | M                             | 28    | 14           | 8                          | 28                 | 1                         | 20                  | 3                          | 29                  | 6                          | 32                  | 7                          | 40    |       |
| 11     | 280701 | Lidocaine    | 35                            | M                             | 31    | 10           | 10                         | 39                 | 3                         | 26                  | 4                          | 33                  | 7                          | 34                  | 8                          | 36    |       |
| 12     | 274779 | Lidocaine    | 29                            | F                             | 27    | 11           | 8                          | 40                 | 1                         | 20                  | 2                          | 35                  | 4                          | 31                  | 6                          | 40    |       |
| 13     | 237717 | Lidocaine    | 42                            | M                             | 36    | 11           | 9                          | 34                 | 3                         | 29                  | 5                          | 29                  | 6                          | 31                  | 7                          | 41    |       |
| 14     | 146187 | Lidocaine    | 31                            | F                             | 25    | 7            | 7                          | 49                 | 3                         | 29                  | 1                          | 30                  | 5                          | 30                  | 7                          | 43    |       |
| 15     | 207701 | Lidocaine    | 31                            | M                             | 30    | 12           | 9                          | 31                 | 2                         | 20                  | 5                          | 26                  | 7                          | 30                  | 8                          | 39    |       |
| 16     | 281298 | Lidocaine    | 26                            | F                             | 30    | 11           | 7                          | 35                 | 1                         | 20                  | 3                          | 29                  | 3                          | 31                  | 7                          | 34    |       |
| 17     | 265229 | Lidocaine    | 33                            | M                             | 31    | 10           | 9                          | 41                 | 2                         | 21                  | 6                          | 31                  | 5                          | 37                  | 9                          | 41    |       |
| 18     | 272520 | Lidocaine    | 41                            | M                             | 32    | 9            | 9                          | 30                 | 3                         | 31                  | 6                          | 34                  | 7                          | 36                  | 7                          | 39    |       |
| 19     | 265755 | Lidocaine    | 35                            | M                             | 30    | 9            | 9                          | 38                 | 1                         | 25                  | 3                          | 35                  | 6                          | 33                  | 7                          | 35    |       |
| 20     | 237829 | Lidocaine    | 30                            | F                             | 28    | 12           | 9                          | 41                 | 1                         | 21                  | 3                          | 36                  | 5                          | 32                  | 7                          | 41    |       |
| 21     | 273735 | Lidocaine    | 41                            | M                             | 35    | 10           | 9                          | 33                 | 3                         | 28                  | 4                          | 28                  | 5                          | 30                  | 6                          | 40    |       |
| 22     | 243534 | Lidocaine    | 33                            | F                             | 26    | 8            | 8                          | 30                 | 3                         | 30                  | 2                          | 31                  | 4                          | 31                  | 8                          | 44    |       |
| 23     | 272133 | Lidocaine    | 30                            | M                             | 29    | 11           | 8                          | 30                 | 1                         | 19                  | 4                          | 25                  | 6                          | 29                  | 7                          | 38    |       |
| 24     | 178817 | Lidocaine    | 37                            | F                             | 31    | 12           | 7                          | 36                 | 3                         | 30                  | 3                          | 30                  | 4                          | 32                  | 7                          | 35    |       |
| 25     | 265342 | Lidocaine    | 31                            | M                             | 30    | 9            | 9                          | 40                 | 1                         | 20                  | 5                          | 30                  | 4                          | 36                  | 8                          | 40    |       |
| 26     | 65885  | Lidocaine    | 40                            | M                             | 31    | 8            | 8                          | 51                 | 3                         | 31                  | 5                          | 33                  | 6                          | 35                  | 6                          | 38    |       |
| 27     | 274393 | Lidocaine    | 30                            | F                             | 25    | 11           | 9                          | 34                 | 1                         | 27                  | 4                          | 29                  | 5                          | 33                  | 8                          | 46    |       |
| 28     | 272528 | Lidocaine    | 31                            | M                             | 26    | 13           | 9                          | 30                 | 2                         | 18                  | 3                          | 28                  | 7                          | 29                  | 6                          | 44    |       |
|        |        |              | mean                          | 37.24                         |       |              |                            | 34.26              | 1.75                      | 34.26               | 1.64                       | 34.26               | 2.31                       | 35.24               | 7.23                       | 38.24 |       |
|        |        |              | SD                            | 6.03                          | MDYMN | 2.71         | 2.00                       | 6.83               | 6.64                      | 0.75                | 4.41                       | 1.34                | 2.39                       | 1.20                | 2.35                       | 0.77  | 5.12  |
| 29     | 193183 | Onase        | 28                            | F                             | 34    | 10           | 6                          | 39                 | 1                         | 46                  | 1                          | 40                  | 3                          | 42                  | 3                          | 42    |       |
| 30     | 276283 | Onase        | 47                            | M                             | 30    | 12           | 8                          | 48                 | 2                         | 37                  | 2                          | 35                  | 4                          | 35                  | 4                          | 43    |       |
| 31     | 265018 | Onase        | 31                            | F                             | 26    | 13           | 9                          | 35                 | 2                         | 43                  | 3                          | 35                  | 3                          | 39                  | 5                          | 44    |       |
| 34     | 237750 | Onase        | 36                            | M                             | 33.5  | 7            | 7                          | 38                 | 1                         | 35                  | 3                          | 39                  | 5                          | 38                  | 6                          | 45    |       |
| 35     | 262331 | Onase        | 44                            | F                             | 27    | 9            | 6                          | 33                 | 3                         | 35                  | 3                          | 35                  | 4                          | 34                  | 5                          | 36    |       |
| 36     | 260123 | Onase        | 29                            | F                             | 35    | 11           | 7                          | 60                 | 2                         | 47                  | 3                          | 41                  | 4                          | 43                  | 4                          | 43    |       |
| 37     | 287837 | Onase        | 46                            | M                             | 29    | 12           | 9                          | 49                 | 3                         | 38                  | 3                          | 36                  | 5                          | 36                  | 5                          | 44    |       |
| 38     | 287837 | Onase        | 50                            | M                             | 25    | 12           | 8                          | 34                 | 1                         | 43                  | 3                          | 34                  | 3                          | 38                  | 4                          | 43    |       |
| 39     | 212334 | Onase        | 37                            | M                             | 32    | 7            | 8                          | 38                 | 1                         | 38                  | 4                          | 37                  | 5                          | 37                  | 5                          | 44    |       |
| 40     | 228337 | Onase        | 43                            | F                             | 28    | 10           | 7                          | 34                 | 3                         | 36                  | 3                          | 36                  | 4                          | 35                  | 5                          | 37    |       |
| 41     | 230615 | Onase        | 30                            | F                             | 36    | 12           | 8                          | 31                 | 3                         | 48                  | 3                          | 45                  | 5                          | 44                  | 5                          | 44    |       |
| 42     | 73834  | Onase        | 47                            | M                             | 30    | 12           | 8                          | 48                 | 2                         | 37                  | 2                          | 35                  | 4                          | 35                  | 4                          | 43    |       |
| 43     | 281789 | Onase        | 31                            | F                             | 26    | 13           | 9                          | 35                 | 2                         | 43                  | 3                          | 35                  | 3                          | 39                  | 5                          | 44    |       |
| 44     | 244721 | Onase        | 34                            | M                             | 31    | 6            | 5                          | 37                 | 1                         | 31                  | 1                          | 37                  | 3                          | 36                  | 4                          | 43    |       |
| 45     | 212187 | Onase        | 46                            | F                             | 29    | 11           | 8                          | 35                 | 5                         | 27                  | 4                          | 27                  | 6                          | 36                  | 7                          | 38    |       |
| 46     | 276122 | Onase        | 29                            | F                             | 35    | 11           | 7                          | 60                 | 2                         | 47                  | 3                          | 41                  | 4                          | 43                  | 4                          | 43    |       |
| 47     | 210471 | Onase        | 44                            | M                             | 27    | 10           | 8                          | 47                 | 1                         | 36                  | 1                          | 35                  | 3                          | 34                  | 3                          | 41    |       |
| 48     | 271472 | Onase        | 31                            | M                             | 26    | 13           | 9                          | 35                 | 1                         | 40                  | 2                          | 35                  | 3                          | 39                  | 5                          | 44    |       |
| 49     | 262909 | Onase        | 29                            | F                             | 25    | 11           | 7                          | 40                 | 3                         | 47                  | 3                          | 41                  | 4                          | 43                  | 4                          | 45    |       |
| 50     | 289414 | Onase        | 46                            | M                             | 29    | 11           | 7                          | 47                 | 1                         | 36                  | 1                          | 34                  | 3                          | 34                  | 5                          | 42    |       |
| 51     | 213334 | Onase        | 33                            | F                             | 27    | 14           | 10                         | 36                 | 3                         | 44                  | 4                          | 36                  | 4                          | 40                  | 6                          | 45    |       |
| 52     | 251189 | Onase        | 35                            | M                             | 32    | 7            | 6                          | 38                 | 1                         | 33                  | 1                          | 38                  | 4                          | 37                  | 5                          | 44    |       |
| 53     | 188971 | Onase        | 45                            | F                             | 28    | 10           | 7                          | 34                 | 4                         | 26                  | 3                          | 26                  | 5                          | 35                  | 6                          | 37    |       |
| 54     | 163680 | Onase        | 28                            | F                             | 34    | 10           | 6                          | 39                 | 1                         | 46                  | 1                          | 40                  | 3                          | 42                  | 3                          | 42    |       |
| 55     | 114280 | Onase        | 43                            | M                             | 28    | 11           | 9                          | 48                 | 3                         | 37                  | 3                          | 35                  | 4                          | 35                  | 4                          | 43    |       |
| 56     | 181568 | Onase        | 31                            | M                             | 26    | 13           | 9                          | 35                 | 2                         | 41                  | 3                          | 35                  | 3                          | 39                  | 5                          | 44    |       |
| 57     | 97814  | Onase        | 36                            | M                             | 30    | 7            | 7                          | 37                 | 1                         | 31                  | 1                          | 27                  | 3                          | 36                  | 4                          | 43    |       |
| 58     | 260816 | Onase        | 46                            | F                             | 29    | 11           | 8                          | 35                 | 4                         | 27                  | 3                          | 27                  | 5                          | 36                  | 6                          | 38    |       |
|        |        |              | mean                          | 41.36                         |       |              |                            | 39.91              | 10.57                     | 7.61                | 46.84                      | 2.68                | 37.35                      | 5.11                | 33.33                      | 5.62  | 41.18 |
|        |        |              | SD                            | 6.34                          |       |              |                            | 9.58               | 1.30                      | 7.46                | 0.93                       | 5.40                | 0.90                       | 1.34                | 1.03                       | 1.59  | 2.55  |
| 59     | 274166 | T. Botulinum | 54                            | M                             | 29    | 14           | 9                          | 42                 | 9                         | 40                  | 6                          | 30                  | 3                          | 26                  | 1                          | 22    |       |
| 60     | 218884 | T. Botulinum | 39                            | F                             | 33    | 10           | 8                          | 49                 | 8                         | 37                  | 7                          | 33                  | 4                          | 29                  | 3                          | 18    |       |
| 61     | 276134 | T. Botulinum | 38                            | M                             | 28    | 16           | 6                          | 61                 | 6                         | 50                  | 5                          | 28                  | 3                          | 27                  | 2                          | 24    |       |
| 64     | 179181 | T. Botulinum | 41                            | F                             | 25.5  | 11           | 8                          | 33                 | 8                         | 33                  | 6                          | 35                  | 3                          | 30                  | 3                          | 19    |       |
| 65     | 216873 | T. Botulinum | 27                            | M                             | 26.5  | 7            | 7                          | 35                 | 7                         | 49                  | 5                          | 27                  | 4                          | 31                  | 1                          | 21    |       |
| 66     | 93306  | T. Botulinum | 33                            | M                             | 30    | 15           | 9                          | 43                 | 9                         | 41                  | 7                          | 31                  | 4                          | 27                  | 2                          | 23    |       |
| 67     | 283395 | T. Botulinum | 38                            | F                             | 32    | 9            | 7                          | 48                 | 7                         | 36                  | 6                          | 32                  | 3                          | 28                  | 2                          | 17    |       |
| 68     | 138844 | T. Botulinum | 39                            | M                             | 29    | 17           | 7                          | 62                 | 7                         | 51                  | 6                          | 29                  | 4                          | 28                  | 3                          | 25    |       |
| 69     | 271469 | T. Botulinum | 40                            | F                             | 24    | 10           | 7                          | 33                 | 7                         | 31                  | 5                          | 34                  | 3                          | 29                  | 3                          | 18    |       |
| 70     | 139488 | T. Botulinum | 28                            | M                             | 31    | 8            | 8                          | 34                 | 8                         | 26                  | 6                          | 24                  | 4                          | 30                  | 2                          | 22    |       |
| 71     | 119163 | T. Botulinum | 36                            | M                             | 29    | 14           | 9                          | 42                 | 9                         | 40                  | 7                          | 30                  | 3                          | 26                  | 1                          | 23    |       |
| 72     | 265622 | T. Botulinum | 39                            | F                             | 31    | 10           | 8                          | 49                 | 8                         | 37                  | 7                          | 33                  | 4                          | 29                  | 3                          | 18    |       |
| 73     | 146784 | T. Botulinum | 38                            | M                             | 28    | 16           | 7                          | 61                 | 6                         | 50                  | 5                          | 28                  | 3                          | 27                  | 2                          | 24    |       |
| 74     | 245493 | T. Botulinum | 39                            | F                             | 24    | 9            | 9                          | 31                 | 7                         | 30                  | 4                          | 33                  | 2                          | 28                  | 1                          | 17    |       |
| 75     | 266889 | T. Botulinum | 29                            | M                             | 32    | 9            | 8                          | 37                 | 8                         | 31                  | 7                          | 29                  | 6                          | 32                  | 3                          | 25    |       |
| 76     | 242940 | T. Botulinum | 33                            | M                             | 30    | 13           | 9                          | 40                 | 9                         | 41                  | 7                          | 31                  | 4                          | 26                  | 1                          | 22    |       |
| 77     | 244030 | T. Botulinum | 40                            | F                             | 31    | 10           | 8                          | 51                 | 8                         | 36                  | 7                          | 30                  | 3                          | 29                  | 1                          | 18    |       |
| 78     | 194126 | T. Botulinum | 36                            | M                             | 27    | 15           | 7                          | 60                 | 8                         | 50                  | 6                          | 31                  | 3                          | 30                  | 2                          | 24    |       |
| 79     | 260018 | T. Botulinum | 35                            | M                             | 30    | 15           | 9                          | 45                 | 9                         | 41                  | 7                          | 31                  | 4                          | 27                  | 2                          | 23    |       |
| 80     | 145301 | T. Botulinum | 36                            | F                             | 32    | 9            | 7                          | 48                 | 7                         | 36                  | 6                          | 33                  | 3                          | 28                  | 2                          | 17    |       |
| 81     | 294008 | T. Botulinum | 39                            | M                             | 29    | 17           | 7                          | 62                 | 7                         | 51                  | 6                          | 29                  | 4                          | 28                  | 3                          | 25    |       |
| 82     | 118484 | T. Botulinum | 40                            | F                             | 25    | 10           | 8                          | 32                 | 8                         | 31                  | 5                          | 34                  | 3                          | 29                  | 2                          | 18    |       |
| 83     | 199816 | T. Botulinum | 28                            | M                             | 31    | 8            | 8                          | 36                 | 8                         | 30                  | 6                          | 28                  | 5                          | 32                  | 1                          | 22    |       |
| 84     | 293218 | T. Botulinum | 34                            | M                             | 29    | 14           | 9                          | 42                 | 9                         | 40                  | 7                          | 30                  | 4                          | 26                  | 1                          | 22    |       |
| 85     | 274472 | T. Botulinum | 39                            | F                             | 33    | 10           | 8                          | 50                 | 8                         | 37                  | 7                          | 33                  | 4                          | 29                  | 3                          | 18    |       |
| 86     | 146756 | T. Botulinum | 35                            | M                             | 28    | 16           | 7                          | 61                 | 6                         | 50                  | 5                          | 28                  | 3                          | 30                  | 2                          | 24    |       |
| 87     | 34189  | T. Botulinum | 39                            | F                             | 25    | 10           | 8                          | 31                 | 9                         | 30                  | 5                          | 33                  | 3                          | 29                  | 1                          | 19    |       |
| 88     | 260518 | T. Botulinum | 29                            | M                             | 31    | 9            | 8                          | 34                 | 8                         | 31                  | 6                          | 30                  | 3                          | 31                  | 3                          | 21    |       |
|        |        |              | mean                          | 40.31                         |       |              |                            | 28.11              | 11.82                     | 7.86                | 48.18                      | 7.86                | 41.75                      | 6.07                | 30.79                      | 3.43  | 28.64 |
|        |        |              | SD                            | 6.50                          |       |              |                            | 2.76               | 3.15                      | 0.85                | 10.39                      | 0.89                | 7.86                       | 0.96                | 2.13                       | 0.92  | 1.81  |
